# Supplementary material
Source: ML conference proceedings conference paper supplement (https://proceedings.mlr.press/v108/fang20a.html)
Supplement: Supplementary file [file fang20a-supp.pdf]

# Greed Meets Sparsity: Understanding and Improving Greedy Coordinate Descent for Sparse Optimization

Huang Fang, Zhenan Fan, Yifan Sun, Michael P. Friedlander

## Appendix

### A Preliminaries

We introduce some notations and Lemmas that appear in earlier works [Nutini et al., 2015, Karimireddy et al., 2019].

We say a gradient step is *good* if the post-processing step in Eq. (3) is not triggered i.e.,  $x_i^{t+1}x_i^t \geq 0$ , otherwise we call this step a *bad* step. We denote the set of good steps until the  $t$ -th iteration as  $\mathcal{G}_t$ , since a bad step always follows a good step, it is easy to verify that

$$|\mathcal{G}_t| \leq \left\lceil \frac{t}{2} \right\rceil. \quad (1)$$

Recall the selection rule in section 3:

**Selection rule 1** (GS-s rule). *Select  $i \in \arg \max_j Q_j(x^t)$  where*

$$Q_i(x) = \min_{s \in \partial g_i} |\nabla_i f(x) + s|. \quad (2)$$

**Lemma 2** ([Karimireddy et al., 2019]). *Assume  $f(\cdot)$  is  $\mu_1$  strongly convex with respect to 1-norm, then the iterates generated from Algorithm 1 with GS-s rule (selection rule 2) satisfy*

$$F(x^t) - F(x^*) \leq \left(1 - \frac{\mu_1}{L}\right)^{\lceil \frac{t}{2} \rceil} (F(0) - F(x^*)).$$

The above lemma is from [Karimireddy et al., 2019].

**Lemma 3** ([Karimireddy et al., 2019]). *Consider  $g(\cdot)$  to be  $\ell_1$  regularization or non-negative constraint. Then if the  $t$ -th iteration is a good step, we have*

$$F(x^{t+1}) \leq F(x^t) - \frac{1}{2L} \max_{i \in [d]} Q_i(x^t)^2, \quad (3)$$

where  $Q_i(\cdot)$  is defined in the GS-s rule (selection rule 2).

### B Proof of Theorem Sketch 2

*Proof.* Let  $W = \{w_1, w_2, \dots, w_k\}$  s.t.  $w_1 < w_2 < \dots < w_k \in \mathbf{N}$ , we define new functions  $h(\cdot) : \mathbb{R}^k \rightarrow \mathbb{R}$ ,  $h(y) = f(\sum_{i=1}^k y_i e_{w_i})$  and  $H(y) := h(y) + \sum_{i=1}^k g_{w_i}(y_i)$ .

First, we show that  $h(y + \alpha e_i)$  is also  $L$ -smooth  $\forall i \in [k]$ .

For any  $i \in [k], y \in \mathbb{R}^k$ ,

$$\begin{aligned} h(y + \alpha e_i) &= f\left(\sum_{j=1}^k y_j e_{w_j} + \alpha e_{w_i}\right) \\ &\leq f\left(\sum_{j=1}^k y_j e_{w_j}\right) + \alpha \nabla_{w_i} f\left(\sum_{j=1}^k y_j e_{w_j}\right) + \frac{L}{2} \alpha^2 \\ &= h(y) + \alpha \nabla_i h(y) + \frac{L}{2} \alpha^2 \end{aligned} \quad (4)$$

Second, we show that we can get the same iterates if we run GCD on  $F(x)$  or  $H(y)$ , that is, we want to show that  $x^t = \sum_{i=1}^k e_{w_i} y_i^t \forall t \geq 0$ . We prove by induction:

When  $t = 0$ , obviously we have  $x^0 = \sum_{i=1}^k e_{w_i} y_i^0 = 0$ .

Suppose that  $x^t = \sum_{i=1}^k e_{w_i} y_i^t$ ,  $i = \arg \max_j Q_j(x^t)$ ,  $\tilde{i} = \arg \max_j Q_j(y^t)$  and  $i = w_m$ , we can show that  $\tilde{i} = m$ :

Note that

$$\begin{aligned} Q_i(x^t) &= \min_{s \in \partial g_i} |\nabla_i f(x^t) + s| \\ &= \min_{s \in \partial g_m} |\nabla_m h(x) + s| \\ &= Q_m(y^t), \end{aligned} \quad (5)$$

Thus, it is easy to see that  $\tilde{i} = m$ .

$$x_i^{t+\frac{1}{2}} = x_i^t - \frac{1}{L} \nabla f_i(x^t) = y_m^t - \frac{1}{L} \nabla h_m(y^t) = y_m^{t+\frac{1}{2}}.$$

Note that  $g_i(\cdot) = g_{w_m}(\cdot)$ , thus we further have

$$x_i^{t+1} = \text{prox}_{\frac{1}{L} g_i} \left[ x_i^{t+\frac{1}{2}} \right] = \text{prox}_{\frac{1}{L} g_{w_m}} \left[ y_m^{t+\frac{1}{2}} \right] = y_{m+1}^{t+1}.$$

Thus we have  $x^t = \sum_{i=1}^k e_{w_i} y_i^t \forall t = 0, 1, 2, \dots$

Plug  $H(\cdot)$  into Lemma 2 and using the above result, we can get

$$F(x^t) - F(x^*) = H(y^t) - H(y^*) \leq \left(1 - \frac{\tilde{\mu}_1}{L}\right)^{\lceil \frac{t}{2} \rceil} (H(0) - H(y^*)) = \left(1 - \frac{\tilde{\mu}_1}{L}\right)^{\lceil \frac{t}{2} \rceil} (F(0) - F(x^*)),$$

where  $\tilde{\mu}_1$  is the 1-norm strongly convex constant for the  $k$ -dimensional small problem  $H(\cdot)$ , since  $H$  is also  $\mu_2$  strongly convex, we can easily verify that  $\max\{\mu_2/k, \mu_1\} \leq \tilde{\mu}_1 \leq \mu_2$ , which completes the proof.  $\square$

## C Proof of Lemma 3

*Proof.* If  $i$  is not select by Algorithm 1 at the  $t$ -th iteration, then  $x_i^{t+1} = 0$  trivially remains 0.

If  $i$  is selected at the  $t$ -th iteration, by assuming  $|\nabla_i f(x^t) - \nabla_i f(x^*)| \leq \delta_i$ , we know that

$$\begin{aligned} -\delta_i + \nabla_i f(x^*) &\leq \nabla_i f(x^t) \leq \delta_i + \nabla_i f(x^*) \\ \stackrel{(i)}{\Rightarrow} -u_i &\leq \nabla_i f(x^t) \leq -l_i, \end{aligned} \quad (6)$$

where (i) follows directly from the definition of  $\delta_i := \min\{-\nabla_i f(x^*) - l_i, u_i + \nabla_i f(x^*)\}$ .

Then we show that  $\text{prox}_{\frac{g}{L_i}}(0 - \frac{1}{L_i}\nabla_i f(x^t)) = 0$ :

$$\text{prox}_{\frac{g}{L_i}}\left(0 - \frac{1}{L_i}\nabla_i f(x^t)\right) = \arg \min_y \left\{ \frac{1}{2} \left( y - \left( -\frac{1}{L_i}\nabla_i f(x^t) \right) \right)^2 + \frac{1}{L_i}g_i(y) \right\} \quad (7)$$

This minimization problem is strongly convex and thus has a unique solution satisfies:

$$0 \in y + \frac{1}{L_i}\nabla_i f(x^t) + \frac{1}{L_i}\partial g_i(y) \quad (8)$$

By knowing  $-u_i \leq \nabla_i f(x^t) \leq -l_i$  from Eq. 6 and  $\text{int}\partial g_i(0) = (l_i, u_i)$  by the definition of  $l_i$  and  $u_i$ . We can easily conclude that  $y = 0$  satisfies Eq. 8 and therefore

$$x_i^{t+1} = \text{prox}_{\frac{g}{L_i}}\left(0 - \frac{1}{L_i}\nabla_i f(x^t)\right) = 0.$$

□

## D Proof of Theorem 4

*Proof.* Let  $t \leq d - \tau$  and recall the definition of *good* steps until the  $t$ -th iteration from section A in Appendix:  $|\mathcal{G}_t| = \{i_1, i_2, \dots, i_k\}$ , where  $k \geq \lceil \frac{t}{2} \rceil$ .

At iteration  $i_m, m \in [k]$ ,  $x^{i_m}$  is guaranteed to be  $m - 1$ -sparse, by assuming  $f(\cdot)$  is  $\mu_1^{(\tau+m-1)}$  strongly convex w.r.t. 1-norm and  $\tau + m - 1$ -sparse vectors, we know that  $F(\cdot)$  is also  $\mu_1$  strongly convex w.r.t. 1-norm and  $\tau + m - 1$ -sparse vectors. Thus  $\forall y \in \mathbb{R}^d$  that is  $\tau$ -sparse,  $|\text{supp}(y) \cup \text{supp}(x^{i_m})| \leq \tau + m - 1$  and by the definition of  $\mu_1^{(\tau+m-1)}$ , we have

$$F(y) \geq F(x^{i_m}) + \langle \partial F(x^{i_m}), y - x^{i_m} \rangle + \frac{\mu_1^{(\tau+m-1)}}{2} \|y - x^{i_m}\|_1^2, \quad (9)$$

with a little bit abuse of notation, here  $\partial F(x^t)$  stands for any vector in the subdifferential of  $F(x^t)$ . Taking minimum on both side of Eq. 9 w.r.t.  $y$  that is  $\tau$  sparse,

$$\begin{aligned} F(x^*) &\geq F(x^{i_m}) - \sup_{\|y\|_0 \leq \tau} \left( \langle -\partial F(x^{i_m}), y - x^{i_m} \rangle - \frac{\mu_1^{(\tau+m-1)}}{2} \|y - x^{i_m}\|_1^2 \right) \\ &\geq F(x^{i_m}) - \sup_{y \in \mathbb{R}^d} \left( \langle -\partial F(x^{i_m}), y - x^{i_m} \rangle - \frac{\mu_1^{(\tau+m-1)}}{2} \|y - x^{i_m}\|_1^2 \right) \\ &\stackrel{(i)}{=} F(x^{i_m}) - \left( \frac{\mu_1^{(\tau+m-1)}}{2} \|\cdot\|_1^2 \right)^* (-\partial F(x^{i_m})) \\ &\stackrel{(ii)}{=} F(x^{i_m}) - \frac{1}{2\mu_1^{(\tau+m-1)}} \|\partial F(x^{i_m})\|_\infty^2, \end{aligned}$$

where (i) is from the definition of conjugate function, and (ii) is from the fact that  $(\frac{1}{2}\|\cdot\|_1^2)^* = \frac{1}{2}\|\cdot\|_\infty^2$  [Boyd and Vandenberghe, 2004].

More specifically,

$$F(x^*) \geq F(x^{i_m}) - \frac{1}{2\mu_1^{(\tau+m-1)}} \|\nabla f(x^{i_m}) + u\|_\infty^2 \quad \forall u \in \partial g(x^{i_m}).$$

By the definition of  $Q_i(\cdot)$  in the GS-s rule (selection rule 2), we further have

$$F(x^*) \geq F(x^{i_m}) - \frac{1}{2\mu_1^{(\tau+m-1)}} \max_{i \in [d]} Q_i(x^{i_m})^2. \quad (10)$$

Recall Lemma 3, we have

$$F(x^{i_{m+1}}) \geq F(x^{i_m}) - \frac{1}{2L} \max_{i \in [d]} Q_i(x^{i_m})^2.$$

Plug the above equation into Eq. (10)

$$\begin{aligned} F(x^*) &\geq F(x^{i_m}) - \frac{L}{\mu_1^{(\tau+m-1)}} (F(x^{i_{m+1}}) - F(x^{i_m})) \\ \Rightarrow F(x^{i_{m+1}}) - F^* &\leq \left(1 - \frac{\mu_1^{(\tau+m)}}{L}\right) (F(x^{i_m}) - F^*). \end{aligned}$$

By applying the above inequality recursively, we get

$$\begin{aligned} F(x^t) - F^* &\leq \prod_{m=1}^k \left(1 - \frac{\mu_1^{(\tau+m-1)}}{L}\right) (F(0) - F^*) \\ &\leq \prod_{i=1}^{\lceil \frac{t}{2} \rceil} \left(1 - \frac{\mu_1^{(\tau+i-1)}}{L}\right) (F(0) - F^*), \end{aligned}$$

which completes the proof. □

## E Proof of Theorem 8

*Proof.* This proof is essentially the same as Theorem 4, the difference is that, by the definition of the  $\Delta$ -GS-s rule (selection rule 7), the Lemma 3 becomes

$$F(x^{t+1}) - F(x^t) \leq -\frac{\Delta}{2L} \max_{i \in [d]} Q_i(x^t)^2$$

at each good step  $t$ .

Knowing that  $\text{supp}(x^t) \subset W_\Delta$ , we have  $|\text{supp}(x^*) \cup \text{supp}(x^t)| \leq |W_\Delta| \forall t > 0$ . Then we can incorporate the new Lemma into the analysis of Theorem 4 and get

$$\begin{aligned} F(x^t) - F^* &\leq \left(1 - \frac{\Delta \mu_1^{|W_\Delta|}}{L}\right)^{\lceil \frac{t}{2} \rceil} (F(0) - F^*) \\ &\leq \left(1 - \frac{\Delta \mu_2}{|W_\Delta| L}\right)^{\lceil \frac{t}{2} \rceil} (F(0) - F^*). \end{aligned}$$

□

## F Proof of Theorem 9

*Proof.*

### Clarify some notations

Given  $\Delta > 0$ , we sort  $W_\Delta = \{i_1, i_2, \dots, i_m\}$  by the number of iteration when they first enter the working set  $W_\Delta$  i.e.,  $i_1$  is the first coordinate being selected and  $i_2$  is the second coordinate to be included in  $W_\Delta$ , etc.

We denote the  $t$ -th iterate from the  $\Delta$ -GCD algorithm as  $x^t$  and the  $t$ -th iterate from the totally corrective greedy algorithm (TCGA) as  $\tilde{x}^t$ .  $W^\sharp = \{\tilde{i}_1, \tilde{i}_2, \dots, \tilde{i}_k\}$ , its elements is also sorted by the time when they enter the working set.

### A claim:

First, we show that  $\forall j \leq k$ , there  $\exists \epsilon_j > 0$  such that  $\forall \Delta < \epsilon_j$ , the first  $j$  elements in  $W_\Delta$  is the same as the first  $j$  elements in  $W^\sharp$ .

We prove this claim by induction, when  $j = 1$ ,  $\forall \Delta \leq 1$ ,  $\Delta$ -GCD and the TCGA both select the coordinate  $\arg \max_{i \in [d]} Q_i(0)$  at the first iteration, thus the claim is true in this base case.

Assuming that the claim is true with some  $j > 0$ , then for  $j + 1$ :

By the continuity of  $Q_i(\cdot)$ , we know that there  $\exists \epsilon'$  such that  $\forall \|x - \tilde{x}^j\| \leq \epsilon'$ ,  $\arg \max_{i \in [d]} Q_i(x) = \tilde{i}_{j+1}$ .

By the uniqueness (recall that  $F(\cdot)$  is strongly convex) of  $\tilde{x}^j$ :

$$\tilde{x}^j := \arg \min_{\text{supp}(x) \subseteq W_j} f(x) + g(x)$$

and the optimality condition, we also know that there  $\exists \delta > 0$  such that  $\forall x \in \mathbb{R}^d$  satisfy  $\text{supp}(x) \subseteq W_j$  and  $\max_{i \in W_j} Q_i(x) \leq \delta$ , we have  $\|x - x^j\| \leq \epsilon'$ .

Denote  $Q_i(x^t)$  (recall  $x^t$  is generated from  $\Delta$ -GCD) is bounded by some constant  $B \forall t > 0$ .

Then, by setting  $\Delta \leq (\min\{\epsilon_j, \delta/B\})^2$ , when  $i_{j+1}$  first enter  $W_\Delta$  at some iteration  $t$ , we have

$$\arg \max_{i \in W_j} Q_i(x^t) \leq \sqrt{\Delta} \arg \max_{i \in [d]} Q_i(x^t) \leq \frac{\delta}{B} B = \delta,$$

also by the induction assumption, we know that  $\text{supp}(x^t) \subseteq W_j$ . Putting these two conditions together, we get  $\|x^t - x^j\| \leq \epsilon'$  and thus  $\arg \max_{i \in [d]} Q_i(x^t) = \tilde{i}_{j+1}$ , which implies that  $i_{j+1} = \tilde{i}_{j+1}$ . And this complete the proof of this claim.

### Back to the proof:

Following the claim, we know that there  $\exists \epsilon_k > 0$  such that for  $\forall \Delta < \epsilon_k$ , the first  $k$  elements in  $W_\Delta$  is just  $W^\sharp$ .

By the nondegeneracy assumption i.e.,  $\delta_i > 0 \forall x_i^* = 0$  and continuity of  $Q_i(\cdot), \nabla f(\cdot)$ , we know that there  $\exists \epsilon'' > 0$  such that  $\forall \|x - x^*\| < \epsilon''$  (note that  $\tilde{x}^k = x^*$ ),  $|\nabla_i f(x) - \nabla_i f(x^*)| \leq \delta_i \forall x_i^* = 0$  and this further implies  $Q_i(x) = 0 \forall i \notin W^\sharp$  (note that  $\text{supp}(x^*) \in W^\sharp$ ).

Again, there exist  $\delta'' > 0$  such that  $\forall x \in \mathbb{R}^d$  satisfy  $\text{supp}_{W^\sharp}(x)$  and  $\max_{i \in W^\sharp} Q_i(x) \leq \delta''$ , we have  $\|x - x^*\| \leq \epsilon''$ .

Thus for  $\Delta \leq \min\{\epsilon_k, \delta''\}$ , the first  $k$  elements in  $W_\Delta$  will be  $W^\sharp$ , and any coordinate  $i \notin W^\sharp$  can not be included in  $W_\Delta$ . Therefore  $W_\Delta = W^\sharp$ .

□

## G Proof of Theorem 5

*Proof.* Given the number of iteration  $t$ , denote  $\mathcal{Z}_t = \{i \in [d] \mid x_i^{t'} = 0 \ \forall t' < t\}$ , which is the entries of  $x^t$  that filled with 0's. and  $\mathcal{V}_t = \{i \in [d] \mid |\nabla_i f(x^{t'}) - \nabla_i f(x^*)| \leq \delta_i \ \forall t' \geq t\}$ .

From Lemma 3 (in the main text), we know that any coordinates in  $\mathcal{Z}_t \cap \mathcal{V}_t$  will always stay at 0 and thus cannot be in  $W$ , that is

$$\begin{aligned} W &\subset [d] \setminus (\mathcal{Z}_t \cap \mathcal{V}_t) \quad \forall t > 0 \\ \Rightarrow |W| &\leq \min_{t \in [d]} \{d - |\mathcal{Z}_t \cap \mathcal{V}_t|\}. \end{aligned} \quad (11)$$

Recall the definition of the set of good steps until the  $t$ -th iteration  $\mathcal{G}_t \subset [t]$ .

$$\begin{aligned} |\mathcal{V}_t| &= \sum_{i=1}^d \mathbf{1}\{|\nabla_i f(x^{t'}) - \nabla_i f(x^*)| \leq \delta_i \ \forall t' \geq t\} \\ &\geq \sum_{i=1}^d \mathbf{1}\{\|\nabla f(x^{t'}) - \nabla f(x^*)\|_\infty \leq \delta_i \ \forall t' \geq t\} \\ &\stackrel{(i)}{\geq} \sum_{i=1}^d \mathbf{1}\{L_\infty \|x^{t'} - x^*\|_1 \leq \delta_i \ \forall t' \geq t\} \\ &\geq \sum_{i=1}^d \mathbf{1}\{L_\infty \sup_{t' \geq t} \|x^{t'} - x^*\|_1 \leq \delta_i\}, \end{aligned} \quad (12)$$

where (i) follows from the  $l_\infty$  smoothness assumption.

By the definition of  $\mathcal{G}_t$  in section A, we also have  $|\mathcal{Z}_t| \geq d - |\mathcal{G}_t|$ , and further

$$\begin{aligned} |\mathcal{Z}_t \cap \mathcal{V}_t| &= |\mathcal{Z}_t| + |\mathcal{V}_t| - |\mathcal{Z}_t \cup \mathcal{V}_t| \\ &\geq d - |\mathcal{G}_t| + |\mathcal{V}_t| - d \\ &\geq |\mathcal{V}_t| - |\mathcal{G}_t|. \end{aligned} \quad (13)$$

Plug the above result in Eq. (11), we get

$$\begin{aligned} |W| &\leq \min_{t > 0} \{d - |\mathcal{V}_t| + |\mathcal{G}_t|\} \\ &\leq \min_{t > 0} \left\{ d - \sum_{i=1}^d \mathbf{1}\{L_\infty \sup_{t' \geq t} \|x^{t'} - x^*\|_1 \leq \delta_i\} + |\mathcal{G}_t| \right\} \\ &\leq \min_{t \in [d]} \left\{ d - \sum_{i=1}^d \mathbf{1}\{L_\infty \sup_{t' \geq t} \|x^{t'} - x^*\|_1 \leq \delta_i\} + t \right\} \\ &= \min_{t \in [d]} B_t + t, \end{aligned} \quad (14)$$

where  $B_t$  is defined as  $B_t := d - p_\delta (L_\infty \sup_{i \geq t} \{\|x^i - x^*\|_1\})$  in Theorem 5 □

## H Proof of Corollary 6

*Proof.* Similar to the proof of Theorem 5, denote  $\mathcal{Z}_t = \{i \in [d] \mid x_i^{t'} = 0 \ \forall t' < t\}$ , which is the entries of  $x^t$  that filled with 0's. and  $\mathcal{V}_t = \{i \in [d] \mid |\nabla_i f(x^{t'}) - \nabla_i f(x^*)| \leq \delta_i \ \forall t' \geq t\}$ .

From Lemma 3 (in the main text), we know that any coordinates in  $\mathcal{Z}_t \cap \mathcal{V}_t$  will always stay at 0 and thus cannot be in  $W$ , that is

$$\begin{aligned} W &\subset [d] \setminus (\mathcal{Z}_t \cap \mathcal{V}_t) \quad \forall t > 0 \\ \Rightarrow |W| &\leq \min_{t \in [d]} \{d - |\mathcal{Z}_t \cap \mathcal{V}_t|\}. \end{aligned} \quad (15)$$

Recall the definition of the set of good steps until the  $t$ -th iteration  $\mathcal{G}_t \subset [t]$ .

$$\begin{aligned} |\mathcal{V}_t| &= \sum_{i=1}^d \mathbf{1}\{|\nabla_i f(x^{t'}) - \nabla_i f(x^*)| \leq \delta_i \ \forall t' \geq t\} \\ &\geq \sum_{i=1}^d \mathbf{1}\{\|\nabla f(x^{t'}) - \nabla f(x^*)\|_\infty \leq \delta_i \ \forall t' \geq t\} \\ &\stackrel{(i)}{\geq} \sum_{i=1}^d \mathbf{1}\{L_\infty \|x^{t'} - x^*\|_1 \leq \delta_i \ \forall t' \geq t\} \\ &\stackrel{(ii)}{\geq} \sum_{i=1}^d \mathbf{1}\left\{L_\infty \sqrt{\frac{2}{\mu_1}} (F(x^t) - F(x^*)) \leq \delta_i \ \forall t' \geq t\right\} \\ &\stackrel{(iii)}{=} \sum_{i=1}^d \mathbf{1}\left\{L_\infty \sqrt{\frac{2}{\mu_1}} (F(x^t) - F(x^*)) \leq \delta_i\right\} \\ &\stackrel{(iv)}{=} p_\delta \left( L_\infty \sqrt{\frac{2}{\mu_1}} (F(x^t) - F(x^*)) \right) \\ &\stackrel{(v)}{\geq} p_\delta \left( L_\infty \sqrt{\frac{2}{\mu_1} \prod_{i=1}^{|\mathcal{G}_t|} \left(1 - \frac{\mu_1^{(\tau+i-1)}}{L}\right)} (F(0) - F^*) \right), \end{aligned} \quad (16)$$

where (i) follows from the  $l_\infty$  smoothness assumption, (ii) is from  $\mu_1$  strongly convex, (iii) is true since  $F(x^t)$  is a decreasing sequence, (iv) is by the definition of  $p_\delta(\cdot)$ , (v) directly follows from Theorem 4.

By the definition of  $\mathcal{G}_t$ , we also have  $|\mathcal{Z}_t| \geq d - |\mathcal{G}_t|$ , and further

$$\begin{aligned} |\mathcal{Z}_t \cap \mathcal{V}_t| &= |\mathcal{Z}_t| + |\mathcal{V}_t| - |\mathcal{Z}_t \cup \mathcal{V}_t| \\ &\geq d - |\mathcal{G}_t| + |\mathcal{V}_t| - d \\ &\geq |\mathcal{V}_t| - |\mathcal{G}_t|. \end{aligned} \quad (17)$$

Plug the above result in Eq. (15), we get

$$\begin{aligned}
|W| &\leq \min_{t>0} \{d - |\mathcal{V}_t| + |\mathcal{G}_t|\} \\
&\leq \min_{t>0} \left\{ d - \left( L_\infty \sqrt{\frac{2}{\mu_1} \prod_{i=1}^{|\mathcal{G}_t|} \left( 1 - \frac{\mu_1^{(\tau+i-1)}}{L} \right)} (F(0) - F^*) \right) + |\mathcal{G}_t| \right\} \\
&\leq \min_{t \in [d]} \left\{ d - \left( L_\infty \sqrt{\frac{2}{\mu_1} \prod_{i=1}^t \left( 1 - \frac{\mu_1^{(\tau+i-1)}}{L} \right)} (F(0) - F^*) \right) + t \right\} \\
&= \min_{t \in [d]} B_t + t,
\end{aligned} \tag{18}$$

where  $B_t$  is defined as  $B_t := d - p_\delta \left( \sqrt{\frac{2L_\infty^2}{\mu_1} \prod_{i=0}^{t-1} \left( 1 - \frac{\mu_1^{(\tau+i)}}{L} \right)} (F(0) - F^*) \right)$  in Theorem 5.  $\square$

## References

- [Boyd and Vandenberghe, 2004] Boyd, S. and Vandenberghe, L. (2004). *Convex Optimization*. Cambridge University Press, New York, NY, USA.
- [Karimireddy et al., 2019] Karimireddy, S. P., Koloskova, A., Stich, S. U., and Jaggi, M. (2019). Efficient greedy coordinate descent for composite problems. In *Proceedings of Machine Learning Research*, volume 89 of *Proceedings of Machine Learning Research*, pages 2887–2896. PMLR.
- [Nutini et al., 2015] Nutini, J., Schmidt, M. W., Laradji, I. H., Friedlander, M. P., and Koepke, H. A. (2015). Coordinate descent converges faster with the gauss-southwell rule than random selection. In *Proceedings of ICML*, pages 1632–1641.
